# Supplementary material
Source: Research Square preprint supplement (doi:10.21203/rs.3.rs-8857240/v1)
Supplement: Supplementary file 1 [file 1f7eb02893581200502205bc.xlsx]

## Sheet: Rice germplasm
The information of core SNP in rice germplasm
sitename	ref	alt	seqinfo	geneID	ricedata_link	varsite	genomic_location	P value	Trait	reference source
osa102617	T	A	CCCAGCTACGAACTGTGGGGGTGATGAGAGGAAATATCTTGGCCTTCTCG(T/A)ACTTGTCAGGGAGCTCCTCGAGCTGATGCAGTCAGGGAAGCTGGAGCCGG	LOC_Os01g04920	https://ricedata.cn/gene/list/34834.htm	upstream_gene_variant	chr1:2271427	5.19e-05	Florets per panicle	https://doi.org/10.1038/ncomms1467
osa3253535	A	C	AATCATTACCGAAGCCAAGAGCGACGCCGCCACCACCGGCATCACTGATT(A/C)GCCGTTGGACACAATGGCCGCGTAAGCCATGCGAGCTATCAGAATGCCTT	LOC_Os02g40510	https://ricedata.cn/gene/list/1895.htm	downstream_gene_variant	chr2:24573278	7.35e-05	Flowering time	https://doi.org/10.1038/ncomms1467
osa4547608	G	A	GTATTTTGTTATAACATTCATGCTGAGGAAACAAAGCGTCTTCTATTACA(G/A)AGTTGCAGTTCGTCTGAATCGGTTAAATTAAAACCTGCCCTGAATTGGCG	LOC_Os03g31150	https://ricedata.cn/gene/list/50081.htm	downstream_gene_variant	chr3:17741591	2.38e-05	Brown rice seed width or seed length/width ratio	https://doi.org/10.1038/ncomms1467
osa5162168	A	T	AATGATTATGGATCCTTTTATCTAAGAGGGGATTGTTGAACACCAACCAA(A/T)CATGTAAACTACCTACTTCTCAGTTTACTTATCCAAATTAGCAGCCCAAA	LOC_Os03g51660	https://ricedata.cn/gene/list/27258.htm	upstream_gene_variant	chr3:29589636	1.1e-23	tiller angle	https://doi.org/10.1371/journal.pgen.1006412
osa6961618	G	C	TAGTTTCTTCTGATTGGCCACATTCCGTAATTTTGTGATCCCCATTGTTT(G/C)CAGGACTGTTGAATTCAATGTCCAAGCTGATTGAAGGTAAACTTCTCTGG	LOC_Os04g51820	https://ricedata.cn/gene/list/844.htm	5_prime_UTR_variant	chr4:30726420	0.000177	leaf blade width	https://doi.org/10.1038/ng.3596
osa6977433	A	C	TTGAGACCGGTGATAGTATCCAGCAGCCAATGAGTCCACCACCATTGTGG(A/C)CACTGCAGCAGACATTGAAACAAGGCCCGCAAAGGGGAAGGGATTCCTAT	LOC_Os04g52310	https://ricedata.cn/gene/list/23842.htm	5_prime_UTR_variant	chr4:31079938	3.03e-05	leaf blade width	https://doi.org/10.1038/ng.3596
osa7409915	G	A	CAGTGGCCACGAGTCAAGATGCTGTATATATGTATGGATGAGTCATCAGT(G/A)TGATGCATGATCTCACATCTCGTCACTGATGATCTCCAGCTTGAGCTTGC	LOC_Os05g09520	https://ricedata.cn/gene/list/29956.htm	upstream_gene_variant	chr5:5361894	1.7e-07	Higher head rice yield	https://doi.org/10.1093/jxb/erz256
osa8689139	T	C	ACCGGCATCACCGGCATCGTCAACGGCATGGACGTCAGCGAGTGGGATCC(T/C)AGCAAGGACAAGTACATCACCGCCAAGTACGACGCAACCACGGTAAGAAC	LOC_Os06g04200	https://ricedata.cn/gene/list/420.htm	synonymous_variant	chr6:1768724	2.79e-12	breakdown-viscosity	https://doi.org/10.1002/tpg2.20134
osa8689111	A	C	GGCTCCTAGGATCCTAAACCTCAACAACAACCCATACTTCAAAGGAACTT(A/C)TGGTGAGTTACAATTGATCTCAAGATCTTATAACTTTCTTCGAAGGAATC	LOC_Os06g04200	https://ricedata.cn/gene/list/420.htm	splice_region_variant	chr6:1768006	1.02e-12	protein content
osa11468877	G	A	GTTGTTGCTTAAGGAGAATGATGGTGACAAAAAATGTATGTTAGAGATCA(G/A)AGTCTTGGAGTTCTATTATAAAGCCCCGTTCGGTAGTGAGCTAGTAGTGG	LOC_Os07g47330	https://ricedata.cn/gene/list/672.htm	upstream_gene_variant	chr7:28305040	8.12e-18	grain weight	https://doi.org/10.1186/s12864-021-07901-x
osa12599342	C	T	ACATCCAGACCAGAAAGCTGTTGTCCCAACAACTGTCTGCAATATCACGT(C/T)ATGCACAGTCATTATTTGAATGCTACTCCCTTCATCCTAAAATAAACCAA	LOC_Os08g33488	https://ricedata.cn/gene/list/15715.htm	intron_variant	chr8:20897662	1.02e-12	grain weight	https://doi.org/10.1038/ng.695
osa12865162	T	G	AATTAACCAACTAATTAAAGTTCGGTAGTAATCCACACTGCTAAATTCTG(T/G)CCGTCATCGATCCGGCCATCGTCGTCGTCTTCTTCATCAGTAGCGAGAAT	LOC_Os08g42350	https://ricedata.cn/gene/list/50.htm	downstream_gene_variant	chr8:26726297	1.37e-05	Flag leaf width	https://doi.org/10.1038/ncomms1467
osa17496031	T	C	TCTTGCTATTTCTTGAGTTCCCTTGCCCCCCAACTTGCCATGCTGAAACA(T/C)CTGATCAGAGGCGTGGCAAGGCTGTTCTTATGGAAGGTGACAGTGAACAG	LOC_Os12g24080	https://ricedata.cn/gene/list/54146.htm	missense_variant	chr12:13698063	7.47e-05	Awn presence	https://doi.org/10.1038/ncomms1467
